# Supplementary material for: Analysis of serum metabolomics among biopsy-proven diabetic nephropathy, type 2 diabetes mellitus and healthy controls
Source: Royal Society of Chemistry journal article supplement (doi:10.1039/c9ra01561b), 2019-01-01
Supplement: c9ra01561b1.pdf [file c9ra01561b1.pdf]

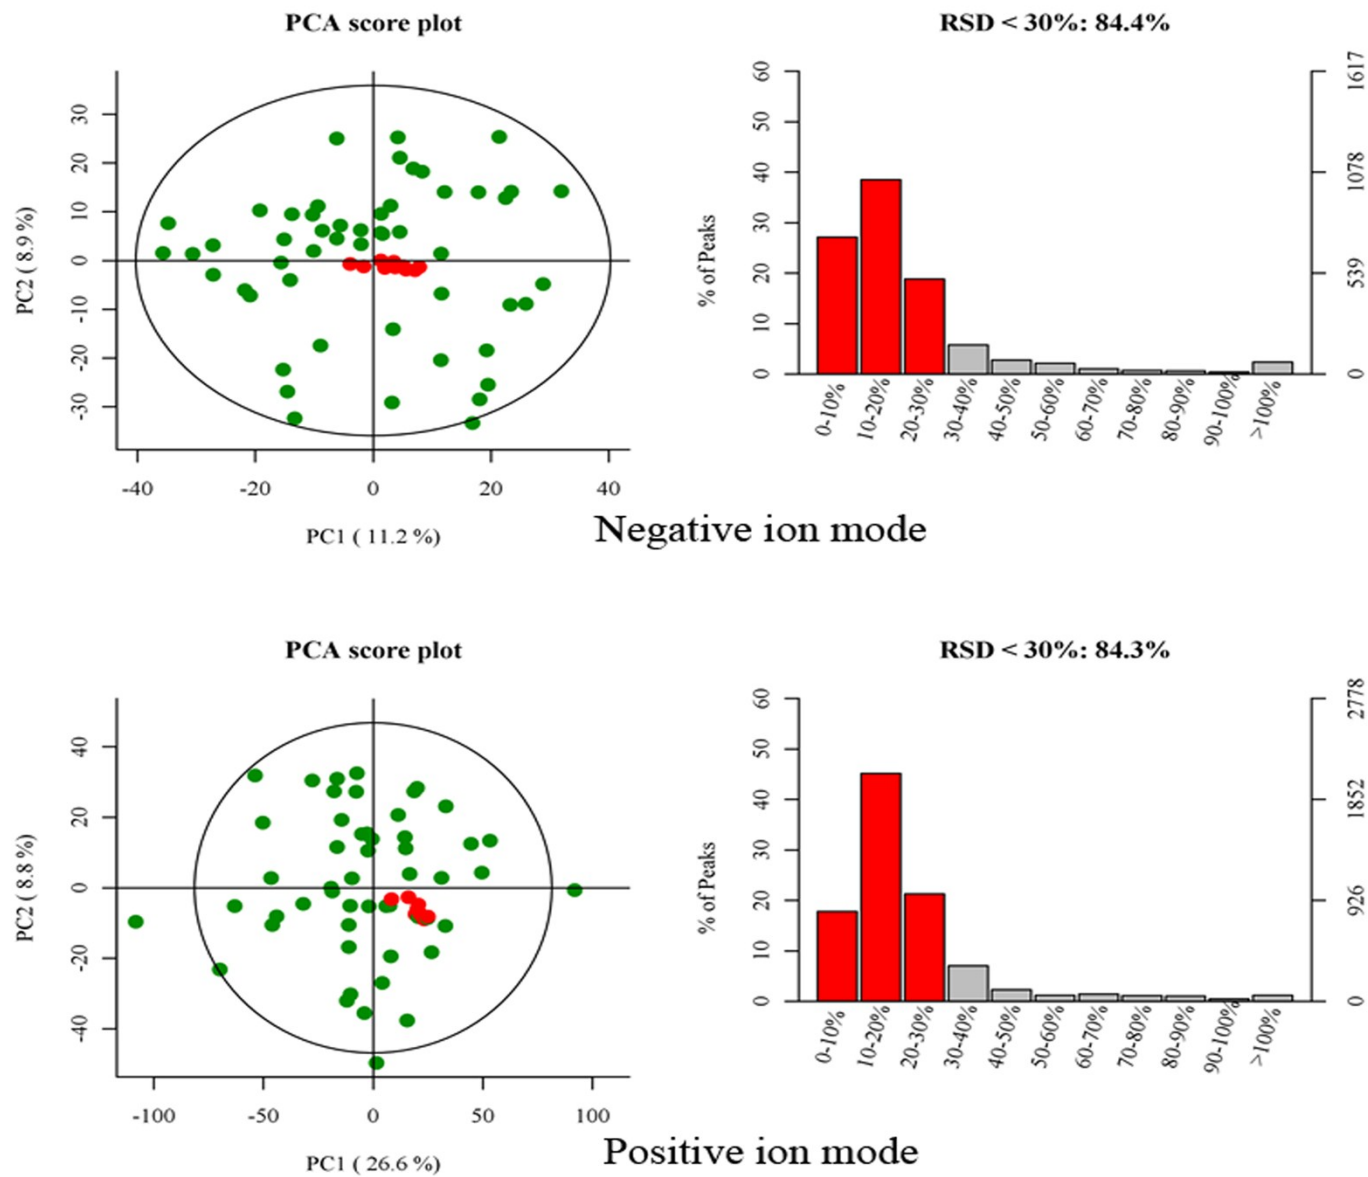

Supplementary Figure 1. PCA score plots and quality assurance (QA) results in the negative and positive ion modes.

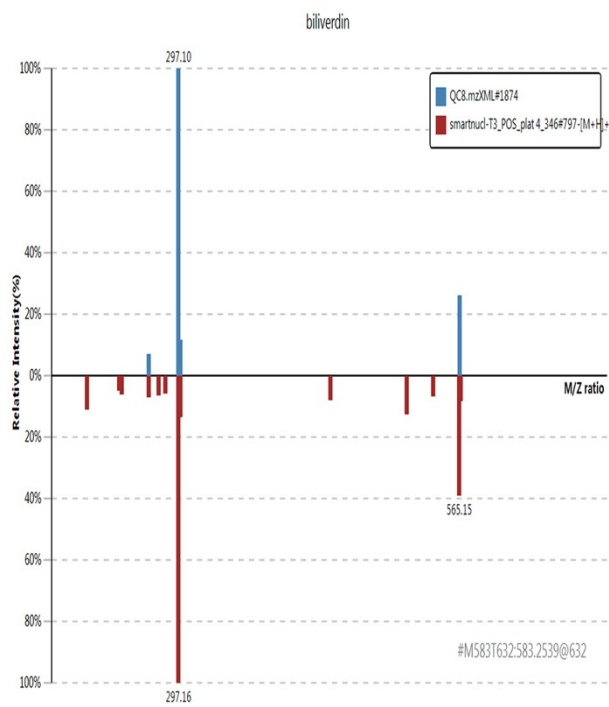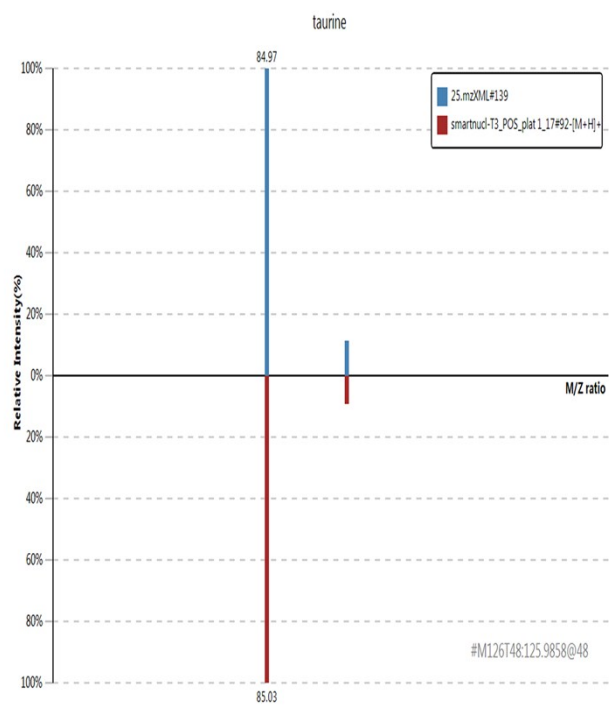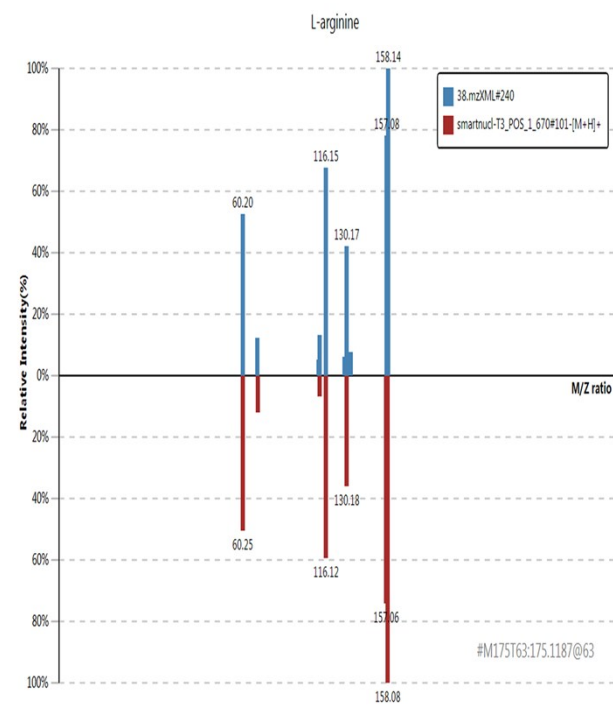

Supplementary Figure 2. Identification graphs for biliverdin, taurine and L-Arginine.

Supplementary Table 1. Detected pathways between DN and DM groups.

|                                             | Total | Hits | Raw P    | $-\log(P)$ | Holm P | FDR     | Impact  |
|---------------------------------------------|-------|------|----------|------------|--------|---------|---------|
| Taurine and hypotaurine metabolism          | 20    | 1    | 0.23566  | 1.4454     | 1      | 1       | 0.33094 |
| Arginine and proline metabolism             | 77    | 4    | 0.01764  | 4.0376     | 1      | 0.82994 | 0.1644  |
| Galactose metabolism                        | 41    | 1    | 0.42499  | 0.85568    | 1      | 1       | 0.08543 |
| Tyrosine metabolism                         | 76    | 3    | 0.077976 | 2.5514     | 1      | 1       | 0.05976 |
| Steroid hormone biosynthesis                | 99    | 1    | 0.74151  | 0.29906    | 1      | 1       | 0.02959 |
| Butanoate metabolism                        | 40    | 2    | 0.097725 | 2.3256     | 1      | 1       | 0.02251 |
| Porphyrin and chlorophyll metabolism        | 104   | 1    | 0.75896  | 0.27581    | 1      | 1       | 0.01844 |
| Citrate cycle (TCA cycle)                   | 20    | 1    | 0.23566  | 1.4454     | 1      | 1       | 0.01684 |
| Purine metabolism                           | 92    | 2    | 0.3477   | 1.0564     | 1      | 1       | 0.01669 |
| Valine, leucine and isoleucine degradation  | 27    | 1    | 0.30465  | 1.1886     | 1      | 1       | 0.01325 |
| Cysteine and methionine metabolism          | 56    | 1    | 0.53151  | 0.63203    | 1      | 1       | 0.01289 |
| Primary bile acid biosynthesis              | 47    | 1    | 0.47015  | 0.7547     | 1      | 1       | 0.00822 |
| Ascorbate and aldarate metabolism           | 45    | 1    | 0.4555   | 0.78637    | 1      | 1       | 0.00802 |
| Alanine, aspartate and glutamate metabolism | 24    | 1    | 0.27586  | 1.2879     | 1      | 1       | 0.00285 |
| Glutathione metabolism                      | 38    | 1    | 0.40104  | 0.9137     | 1      | 1       | 0.0019  |
| Glycine, serine and threonine metabolism    | 48    | 1    | 0.47734  | 0.73953    | 1      | 1       | 0.00071 |
| Lysine degradation                          | 47    | 1    | 0.47015  | 0.7547     | 1      | 1       | 0.0005  |
| Synthesis and degradation of ketone bodies  | 6     | 1    | 0.07724  | 2.5608     | 1      | 1       | 0       |
| D-Arginine and D-ornithine metabolism       | 8     | 1    | 0.10168  | 2.2859     | 1      | 1       | 0       |
| D-Glutamine and D-glutamate metabolism      | 11    | 1    | 0.13716  | 1.9866     | 1      | 1       | 0       |
| Nitrogen metabolism                         | 39    | 1    | 0.40913  | 0.89372    | 1      | 1       | 0       |
| Valine, leucine and isoleucine degradation  | 40    | 1    | 0.41711  | 0.8744     | 1      | 1       | 0       |
| Nicotinate and nicotinamide metabolism      | 44    | 1    | 0.44802  | 0.80292    | 1      | 1       | 0       |
| Phenylalanine metabolism                    | 45    | 3    | 0.020749 | 3.8753     | 1      | 0.82994 | 0       |
| Aminoacyl-tRNA biosynthesis                 | 75    | 2    | 0.26303  | 1.3355     | 1      | 1       | 0       |

Total: total number of metabolites in objective metabolic pathways; Hits: number of differential metabolites in objective metabolic pathways; Raw P: Raw P values;  $-\log(P)$ : negative natural logarithm of P values; Holm P: P values after Holm Correction; FDR: P values after FDR Correction; Impact: impact values of metabolic pathways.
